# Supplementary material for: One Step In-Situ Synthesis of Zinc Oxide Nanoparticles for Multifunctional Cotton Fabrics
Source: MDPI journal article supplement (doi:10.3390/ma14143956), 2021-07-15
Supplement: s1 [file s1]

Supplementary Materials

# One step *in-situ* synthesis of zinc oxide nanoparticles for multifunctional cotton fabrics

Asif Javed<sup>1\*</sup>, Jakub Wiener<sup>1</sup>, Asta Tamulevičienė<sup>2,3</sup>, Tomas Tamulevičius<sup>2,3</sup>, Algirdas Lazauskas<sup>2</sup>, Jana Saskova<sup>1</sup>, and Simas Rackauskas<sup>2,3</sup>

<sup>1</sup>Department of Material Engineering, Faculty of Textile Engineering, Technical University of Liberec, Liberec 46001, Czech Republic

<sup>2</sup>Institute of Materials Science, Kaunas University of Technology, K. Baršausko St. 59LT-51423 Kaunas, Lithuania

<sup>3</sup>Department of Physics, Kaunas University of Technology, Studentų St. 50, Kaunas LT-51423, Lithuania

\* Corresponding author e-mail: [asif.javed@tul.cz](mailto:asif.javed@tul.cz)

**Table S1** Statistical analysis by t –test (effect of  $\text{Zn}(\text{NO}_3)_2 \cdot 6\text{H}_2\text{O}$  (M) on deposited amount of Zn Contents gram/kg)

|                              | $\text{Zn}(\text{NO}_3)_2 \cdot 6\text{H}_2\text{O}$ (M) | Zn contents(gram/kg) |
|------------------------------|----------------------------------------------------------|----------------------|
| Mean                         | 0.283                                                    | 3.349                |
| Variance                     | 0.031                                                    | 2.245                |
| Observations                 | 9                                                        | 9                    |
| Pearson Correlation          | 0.572                                                    |                      |
| Hypothesizes Mean Difference | 0                                                        |                      |
| df                           | 8                                                        |                      |
| t stat                       | -6.5416                                                  |                      |
| P(T<=t) one tail             | 0.00009                                                  |                      |
| t critical one tail          | 1.8595                                                   |                      |
| P(T<=t) two tail             | 0.00018                                                  |                      |
| t critical two tail          | 2.306                                                    |                      |

**Table S2** statistical analyses by t –test (effect of NaOH (M) on deposited amount of Zn Contents gram/kg)

|                              | NaOH (M) | Zn contents(gram/kg) |
|------------------------------|----------|----------------------|
| Mean                         | 0.283    | 3.349                |
| Variance                     | 0.031    | 2.245                |
| Observations                 | 9        | 9                    |
| Pearson Correlation          | 0.576    |                      |
| Hypothesizes Mean Difference | 0        |                      |
| df                           | 8        |                      |
| t stat                       | -6.5453  |                      |
| P(T<=t) one tail             | 0.00008  |                      |
| t critical one tail          | 1.8595   |                      |
| P(T<=t) two tail             | 0.00017  |                      |
| t critical two tail          | 2.306    |                      |

**Table S3** UPF value and protection category of the fabric categorized by The Australian standardization Institute[1]

| UPF Value    | Protection Level |
|--------------|------------------|
| Below 15     | Not good         |
| 15-24        | Good             |
| 24-39        | Very good        |
| 40 and above | Excellent        |

**Table S4** Statistical analysis by t –test (effect of Zn Contents gram/kg on UPF value)

|                              | Zn contents(gram/kg) | UPF     |
|------------------------------|----------------------|---------|
| Mean                         | 3.01                 | 63.529  |
| Variance                     | 3.11                 | 1553.63 |
| Observations                 | 10                   | 10      |
| Pearson Correlation          | 0.98                 |         |
| Hypothesizes Mean Difference | 0                    |         |
| df                           | 9                    |         |
| t stat                       | -5.078               |         |
| P(T<=t) one tail             | 0.00033              |         |
| t critical one tail          | 1.833                |         |
| P(T<=t) two tail             | 0.00066              |         |
| t critical two tail          | 2.262                |         |

**Table S5** Statistical analysis by t –test (effect of Zn Contents gram/kg on UVA Blocking%)

|                              | Zn contents(gram/kg)   | UVA Blocking% |
|------------------------------|------------------------|---------------|
| Mean                         | 3.01                   | 93.64         |
| Variance                     | 3.11                   | 54.46         |
| Observations                 | 10                     | 10            |
| Pearson Correlation          | 0.73                   |               |
| Hypothesizes Mean Difference | 0                      |               |
| df                           | 9                      |               |
| t stat                       | -46.17                 |               |
| P(T<=t) one tail             | 2.6 x10 <sup>-12</sup> |               |

|                     |                       |
|---------------------|-----------------------|
| t critical one tail | 1.833                 |
| P(T<=t) two tail    | $5.2 \times 10^{-12}$ |
| t critical two tail | 2.262                 |

**Table S6** Statistical analysis by t –test (effect of Zn Contents gram/kg on UVB Blocking%)

|                              | Zn contents(gram/kg)  | UVB Blocking% |
|------------------------------|-----------------------|---------------|
| Mean                         | 3.01                  | 96.07         |
| Variance                     | 3.11                  | 42.21         |
| Observations                 | 10                    | 10            |
| Pearson Correlation          | 0.72                  |               |
| Hypothesizes Mean Difference | 0                     |               |
| df                           | 9                     |               |
| t stat                       | -54.82                |               |
| P(T<=t) one tail             | $5.6 \times 10^{-13}$ |               |
| t critical one tail          | 1.833                 |               |
| P(T<=t) two tail             | $1.1 \times 10^{-12}$ |               |
| t critical two tail          | 2.262                 |               |

**Table S7** Statistical analysis by t –test (effect of Zn Contents gram/kg on *S.aureus*(Reduction%))

|                              | Zn contents(gram/kg) | <i>S.aureus</i> (Reduction%) |
|------------------------------|----------------------|------------------------------|
| Mean                         | 3.348                | 73.06                        |
| Variance                     | 2.245                | 400.47                       |
| Observations                 | 9                    | 9                            |
| Pearson Correlation          | 0.95                 |                              |
| Hypothesizes Mean Difference | 0                    |                              |
| df                           | 8                    |                              |
| t stat                       | -11.25               |                              |
| P(T<=t) one tail             | 1.7x10 <sup>-6</sup> |                              |
| t critical one tail          | 1.86                 |                              |
| P(T<=t) two tail             | 3.4x10 <sup>-6</sup> |                              |
| t critical two tail          | 2.31                 |                              |

**Table S8** Statistical analysis by t –test (effect of Zn Contents gram/kg on *E.coli* (Reduction%))

|                              | Zn contents(gram/kg) | <i>E.coli</i> (Reduction%) |
|------------------------------|----------------------|----------------------------|
| Mean                         | 3.348                | 72.84                      |
| Variance                     | 2.245                | 389.26                     |
| Observations                 | 9                    | 9                          |
| Pearson Correlation          | 0.94                 |                            |
| Hypothesizes Mean Difference | 0                    |                            |
| df                           | 8                    |                            |
| t stat                       | -11.37               |                            |
| P(T<=t) one tail             | 1.6x10 <sup>-6</sup> |                            |
| t critical one tail          | 1.86                 |                            |

|                     |                      |
|---------------------|----------------------|
| P(T<=t) two tail    | 3.4x10 <sup>-6</sup> |
| t critical two tail | 2.31                 |

**Table S9** Statistical analysis by t –test (effect of Zn Contents gram/kg on ΔE)

|                              | Zn contents(gram/kg) | ΔE     |
|------------------------------|----------------------|--------|
| Mean                         | 3.01                 | 55.61  |
| Variance                     | 3.11                 | 576.99 |
| Observations                 | 10                   | 10     |
| Pearson Correlation          | 0.95                 |        |
| Hypothesizes Mean Difference | 0                    |        |
| df                           | 9                    |        |
| t stat                       | -7.44                |        |
| P(T<=t) one tail             | 1.9x10 <sup>-5</sup> |        |
| t critical one tail          | 1.833                |        |
| P(T<=t) two tail             | 3.9x10 <sup>-5</sup> |        |
| t critical two tail          | 2.26                 |        |

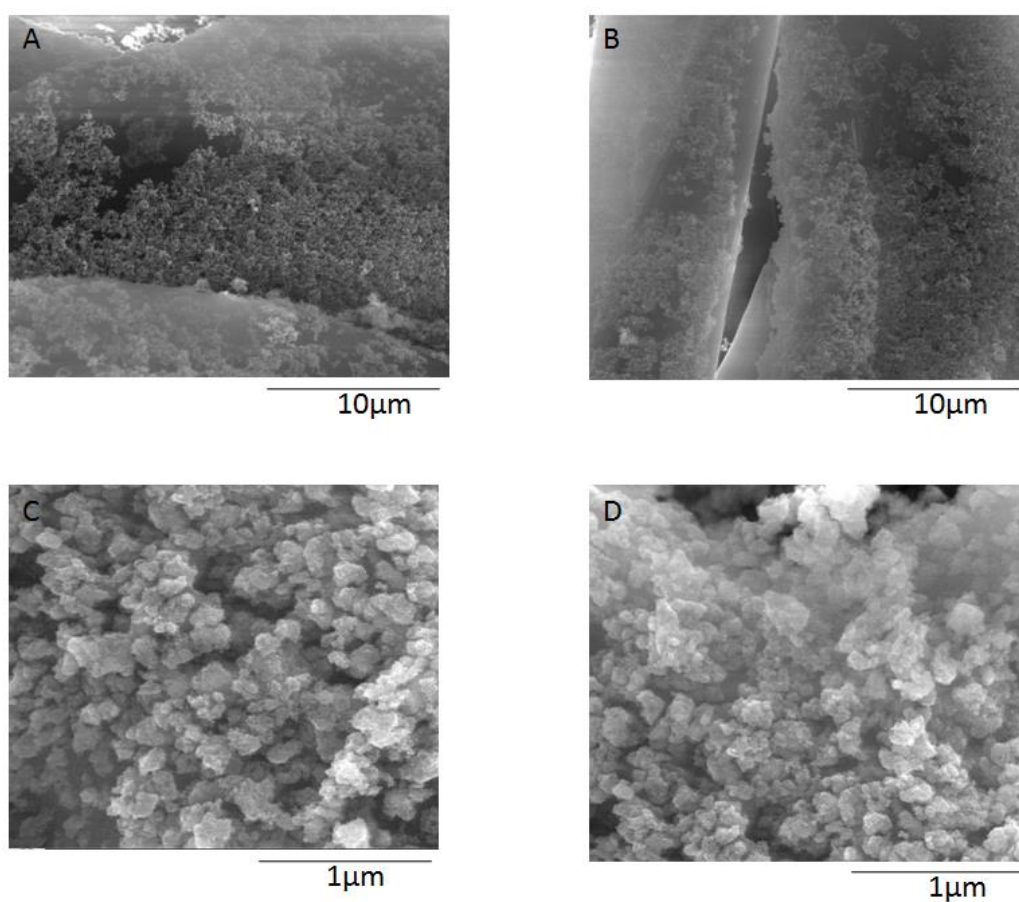

Figure S1 SEM Images A and C Zn contents 4.671 gram/kg (Sample9). B and D Zn contents 4.021 gram/kg (sample 8)

## References

1. Gies, P.; Slevin, T.; Harrison, S.; Plowman, P.; Dain, S.; Moller, L.; Mawley, F.; Swift, N. *Australian/New Zealand Standard, AS/NZS 4399: 2017: Sun Protective Clothing—Evaluation and Classification*; Standards Australia, 2017; ISBN 1760358843.
